# Supplementary material for: A plum-pudding like mesoporous SiO2/flake graphite nanocomposite with superior rate performance for LIB anode materials
Source: Royal Society of Chemistry journal article supplement (doi:10.1039/c5cp03505h), 2015-01-01
Supplement: c5cp03505h1.pdf [file c5cp03505h1.pdf]

## Supporting Information

### A plum-pudding like mesoporous SiO<sub>2</sub>/flake graphite nanocomposite with superior rate performance for LIBs anode material

*Huan-Huan Li, † Lin-Lin Zhang, † Chao-Ying Fan, † Kang Wang, † Xing-Long Wu, †*

*Hai-Zhu Sun<sup>†,\*</sup> Jing-Ping Zhang<sup>†,\*</sup>*

<sup>†</sup> Faculty of Chemistry, National & Local United Engineering Laboratory for Power Batteries, Northeast Normal University, Changchun 130024, China.

\* E-mail: [sunhz335@nenu.edu.cn](mailto:sunhz335@nenu.edu.cn); [jpzhang@nenu.edu.cn](mailto:jpzhang@nenu.edu.cn).

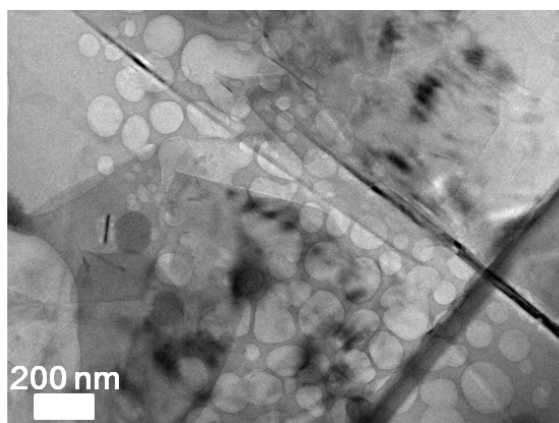

**Figure S1.** TEM image of the pure flake graphite obtained by etching the pp-MSNs/FG nanocomposite using the HF aqueous solution.

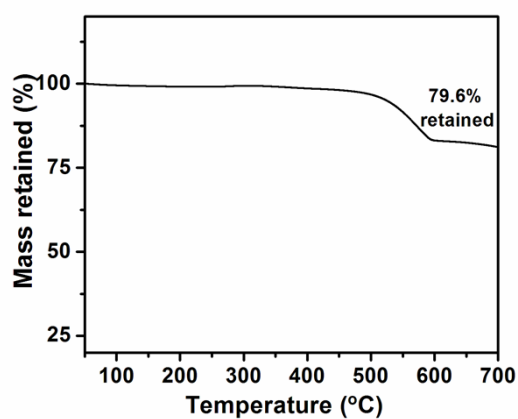

**Figure S2.** TG curve of the pp-MSNs/FG nanocomposite under air atmosphere.

**Table S1.** Specific surface area, pore volume and average pore diameter of MSNs and pp-MSNs/FG nanocomposite.

| Samples    | BET                            | Pore volume                     | Pore diameter |
|------------|--------------------------------|---------------------------------|---------------|
|            | ( $\text{m}^2 \text{g}^{-1}$ ) | ( $\text{cm}^3 \text{g}^{-1}$ ) | (nm)          |
| MSNs       | 424.3                          | 0.59                            | 2.4           |
| pp-MSNs/FG | 210.9                          | 0.45                            | 1.6, 2.2      |

**Table S2.** The atom and weight percentages of C, O and Si contents of the pp-MSNs/FG in XPS analysis result.

|      | C     | Si    | O     |
|------|-------|-------|-------|
| At.% | 40.4  | 20.58 | 39.02 |
| Wt.% | 28.76 | 34.19 | 37.05 |

**Table S3.** Electrochemical properties of pp-MSNs/FG nanocomposite and other reported anode materials.

| <b>Material</b>                                       | <b>Current density<br/>(mA g<sup>-1</sup>)</b> | <b>Capacity<br/>(mAh g<sup>-1</sup>)</b> | <b>Ref.</b> |
|-------------------------------------------------------|------------------------------------------------|------------------------------------------|-------------|
| Nanostructured SiO <sub>2</sub> /C<br>composites      | 250                                            | 551                                      | Ref. 42     |
|                                                       | 500                                            | 451                                      |             |
|                                                       | 1000                                           | 356                                      |             |
| Nitrogen-doped ordered<br>mesoporous carbon/silica    | 250                                            | 490                                      | Ref. 39     |
|                                                       | 500                                            | 372                                      |             |
|                                                       | 1000                                           | 289                                      |             |
| Nanosilica/carbon composite                           | 50                                             | 680                                      | Ref. 33     |
|                                                       | 600                                            | 358                                      |             |
| Carbon/silica composite                               | 200                                            | 430                                      | Ref. 41     |
|                                                       | 500                                            | 320                                      |             |
|                                                       | 1000                                           | 210                                      |             |
| SiO <sub>2</sub> /Cu/polyacrylonitrile-C<br>composite | 440                                            | 352                                      | Ref. 38     |
|                                                       | 300                                            | 667.1                                    |             |
| pp-MSNs/FG                                            | 500                                            | 656.1                                    | This work   |
|                                                       | 1000                                           | 561.5                                    |             |
|                                                       | 3000                                           | 343.8                                    |             |
|                                                       | 5000                                           | 239.6                                    |             |

**Table S4.** The electrical resistivities ( $\rho$ ) of FG and pp-MSNs/FG.

| <b>Material</b>                  | <b>FG</b>           | <b>pp-MSNs/FG</b>   | <b>MSNs</b> |
|----------------------------------|---------------------|---------------------|-------------|
| $\rho$ ( $\Omega\cdot\text{m}$ ) | $6.4\times 10^{-6}$ | $3.4\times 10^{-4}$ | insulator   |
